# Supplementary material
Source: publisher figshare collection journal article supplement (https://sage.figshare.com/ndownloader/files/18542057)
Supplement: Supplementary file 1 [file 18542057]

Supplementary file 1. Search terms for this qualitative systematic review

| Intervention                                                                                                                                              | Group                       | Other terminology                                                                         |
|-----------------------------------------------------------------------------------------------------------------------------------------------------------|-----------------------------|-------------------------------------------------------------------------------------------|
| Culturally-tailored diabetes management<br>Culturally-tailored intervention<br>Culturally-appropriated diabetes management<br>Culturally-tailored program | Diabetes<br>Type 2 diabetes | Qualitative study<br>Qualitative research<br>Interview<br>Focus groups<br>Experience<br>. |

Supplementary file 2. PubMed search strategy

|    |                                         |
|----|-----------------------------------------|
| 1  | Culturally-tailored diabetes management |
| 2  | Culturally-appropriated intervention    |
| 3  | Culturally-tailored intervention        |
| 4  | Diabetes                                |
| 5  | Qualitative study                       |
| 6  | 1 or 2 or 3                             |
| 7  | 4 or 6                                  |
| 8  | 5 and 7                                 |
| 9  | Experience                              |
| 10 | Focus groups                            |
| 11 | Interview                               |
| 12 | 9 or 10 and 11                          |
| 13 | 8 and 12                                |
